# Supplementary material
Source: HighWire-hosted journal article supplement (https://bmjopen.bmj.com/content/13/3/e070734)
Supplement: inline-supplementary-material-3 [file inline-supplementary-material-3.pdf]

| <b>Data Charting Categories</b> |                                           |
|---------------------------------|-------------------------------------------|
| 1.                              | Title                                     |
| 2.                              | Author                                    |
| 3.                              | Year                                      |
| 4.                              | Country                                   |
| 5.                              | Study aim                                 |
| 6.                              | Timeframe                                 |
| 7.                              | Study setting                             |
| 8.                              | Patient population                        |
| 9.                              | Intervention                              |
| 10.                             | Comparator, if any                        |
| 11.                             | Programme name                            |
| 12.                             | Programme goal                            |
| 13.                             | Setting                                   |
| 14.                             | Programme participants                    |
| 15.                             | Programme mode of delivery                |
| 16.                             | Course detail                             |
| 17.                             | Programme Length                          |
| 18.                             | Who taught the course?                    |
| 19.                             | Educational philosophy                    |
| 20.                             | Was the programme evaluated?              |
| 21.                             | Evaluation methods                        |
| 22.                             | Outcomes assessed (Patient & Participant) |
| 23.                             | Kirkpatrick level of evaluation           |
